1 *Research Article*

# 2 **Expression of Pokeweed Antiviral Protein Isoform S1** 3 **(PAP-S1) and of Ricin-A-Chain/PAP-S1 novel fusion** 4 **protein (RTA/PAP-S1) in *Escherichia coli* and their** 5 **comparative inhibition of protein synthesis *in vitro***

6 **Yasser Hassan** <sup>1\*</sup> and **Sherry Ogg** <sup>2</sup>

7 <sup>1</sup> Ophiuchus Medicine LLC; yhassan@ophiuchus.institute

8 <sup>2</sup> Johns Hopkins University; slojac@gmail.com

9 \* Correspondence: yhassan@ophiuchus.institute

10 Academic Editor: name

11 Received: date; Accepted: date; Published: date

12 **Abstract:** Fusion protein therapeutics engineering is advancing to meet the need for novel  
13 medicine. Herein, we further characterize the development of novel RTA & PAP-S1 antiviral  
14 fusion proteins. In brief, RTA/PAP-S1 and PAP-S1/RTA fusion proteins were produced in both cell  
15 free and *E. coli in vivo* expression systems, purified by His-tag affinity chromatography, and  
16 protein synthesis inhibitory activity assayed by comparison to the production of a control protein,  
17 CalmL3. Results showed that the RTA/PAP-S1 fusion protein is amenable to standardized  
18 production and purification and has both increased potency and less toxicity compared to either  
19 RTA or PAP-S1 alone. Thus, this research highlights the developmental potential of novel fusion  
20 proteins with reduced cytotoxic risk and increased potency.

21 **Keywords:** fusion proteins; protein therapeutics; ricin; pokeweed antiviral protein; protein  
22 engineering; immunotoxins; ribosome-inactivating proteins.

23

---

## 24 **1. Introduction**

25 Pokeweed antiviral proteins (PAPs) are potent type I Ribosome Inactivating Proteins (RIPs)  
26 expressed in several organs of the plant pokeweed (*Phytolacca americana*), as reviewed by  
27 Domashevskiy and Goss [1]. They are chiefly secreted and bound within the plant cell wall matrix.  
28 Here, they are known to function in defense against pathogens through the inhibition of both  
29 prokaryotic and eukaryotic ribosomes and protein synthesis. Among the PAP gene family, different  
30 genes are expressed in various tissues and at different stages of development in *Phytolacca*  
31 *americana*. PAP, PAP II, PAP-S1, PAP-S2, and PAP-R are the forms that appear in spring leaves,  
32 summer leaves, isoform S1 and S2 in seeds, and roots, respectively. The molecular weight ranges  
33 from 29 kDa for PAP to 30 kDa for PAP-S's [2]. PAP-S1 has been identified as the most effective in  
34 inhibiting protein synthesis *in vitro* [3]. PAPs possess antiviral activity on a wide range of plant and  
35 human viruses; different forms of PAP expressed in transgenic plants leads to broad-spectrum  
36 resistance to viral and fungal infections [4-5]. Relevant to the recent Zika epidemic, PAP is efficient  
37 against Japanese encephalitis virus [6]. Antiviral activity is also present against HIV-1 [7], human  
38 T-cell leukemia virus-1 (HTLV-1) [8], herpes simplex virus (HSV) [9], influenza [10], hepatitis B  
39 virus (HBV) [11], and poliovirus [12]. Moreover, different forms of PAP have moderate cytotoxicity  
40 to non-infected cells and, thus, offer unique opportunities for new applications in therapy and as a  
41 protective protein against pathogens in transgenic plants.

42 Ricin is produced in the seeds of the castor oil plant, *Ricinus communis*, and is one of the most  
43 potent type II RIPs, as reviewed by Lord et al [13]. It can efficiently deliver its A chain into the  
44 cytosol of cells through the action of its B chain. The B chain serves as a

45 galactose/N-acetylgalactosamine binding domain (lectin) and is linked to the A chain via disulfide  
46 bonds. After the ricin B chain binds complex carbohydrates on the surface of eukaryotic cells  
47 containing either terminal N-acetylgalactosamine or beta-1,4-linked galactose residues, it is  
48 endocytosed via clathrin-dependent as well as clathrin-independent mechanisms and is thereafter  
49 delivered into the early endosomes. It is then transported to the Golgi apparatus by retrograde  
50 transport to reach the endoplasmic reticulum (ER) where its disulfide bonds are cleaved by  
51 thioredoxin reductases and disulfide isomerases. The median lethal dose (LD50) of ricin is around  
52 22 micrograms per kilogram of body weight if the exposure is from injection or inhalation (1.78  
53 milligram for an average adult). It is important to note that the ricin A chain (RTA) on its own has  
54 less than 0.01% of the toxicity of the native lectin in a cell culture test system. It was furthermore  
55 shown that RTA alone had no activity on non-infected and tobacco mosaic virus (TMV)-infected  
56 tobacco protoplasts alike. Though there are currently no commercially available therapeutic  
57 applications, RTA is extensively studied in the development of immunotoxins [14].

58 The therapeutic potential of PAP and RTA has been explored for over thirty years, though side  
59 effects have limited clinical application. As evaluated by Benigni et al [15], while these proteins  
60 have shown very low cytotoxicity to non-infected cells, PAP administration in mouse models has  
61 resulted in hepatic, renal and gastrointestinal tract damage with an LD50 as low as 1.6mg/Kg.  
62 Interestingly, RTA shows no toxicity even at high doses with similar half-life times. However, all  
63 RIP's show immunosuppressive effects to various degrees. Other studies have described the  
64 various dose-limiting side effects of these proteins when used as immunotoxins (i.e. vascular leak  
65 syndrome, hemolytic uremic syndrome, and pluritis, among others) [16-17]. Excitingly, some  
66 patients achieved complete or partial remission against Refractory B-Lineage Acute Lymphoblastic  
67 Leukemia with sub-toxic dosages, for example.

68 Fusion and hybrid PAP proteins have also been developed in pursuit of selectively targeting  
69 infected cells and selectively recognizing viral components, though with limited success [18-19].  
70 Indeed, the engineering of novel therapeutic fusion proteins with higher specificity, selectivity, and  
71 potency with fewer side effects is a leading strategy in drug development.

72 Thus, this research furthers study of a previously created and functional novel fusion protein  
73 between RTA and PAP-S1 [20]. Here, we describe the increased potency over PAP-S1 alone,  
74 selectivity for infected cells, and reduced side effects associated with dosage. Additionally, we  
75 describe the development of an adequate and scalable production system that enabled accurate  
76 determination of PAP-S1 and RTA/PAP-S1 protein synthesis inhibition *in vitro*.

## 77 2. Results

### 78 2.1. Production and Purification of recombinant Proteins in Cell Free Expression System

79 The proteins were expressed and bands visible where expected (Figure 1). It is noted that  
80 expression of the three recombinant proteins is very low compared to the control protein and, more  
81 importantly, with a much lower purity; expression of PAP-S1 is the lowest. The low levels of  
82 expression of the recombinant proteins were expected as the proteins are known to be toxic to  
83 prokaryotic ribosomes. Total protein content and purity of each sample is shown in Table 1.

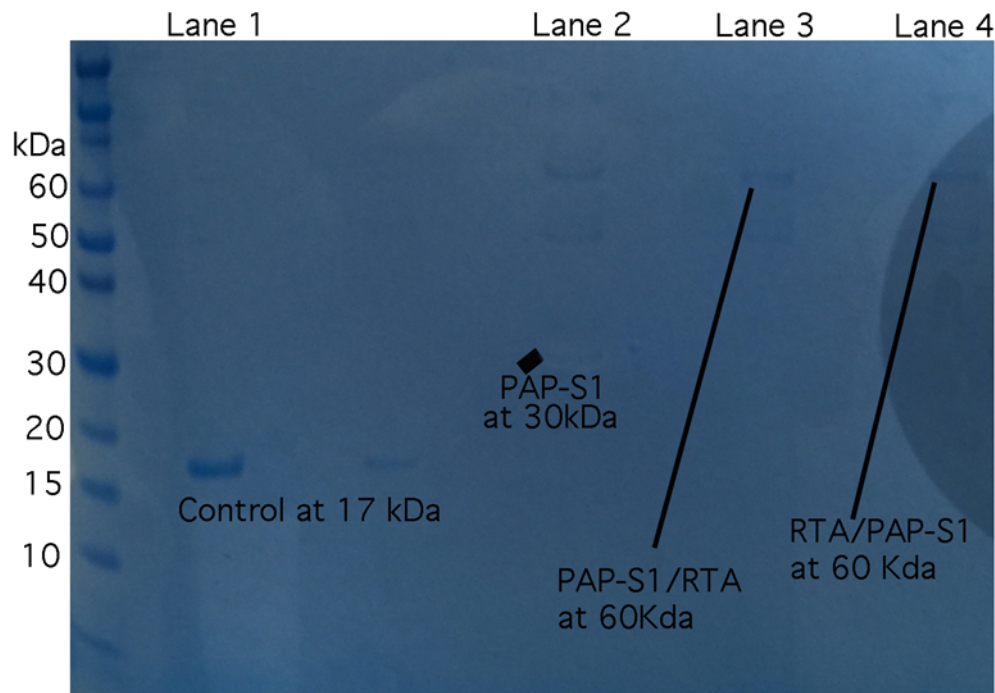

84

85 **Figure 1.** Recombinant proteins gel stained with Coomassie blue after His-Tag purification.

86 Lane 1: Control protein after His-Tag Purification. The band is clearly visible at 17kDa.

87 Lane 2: PAP-S1 recombinant protein at the 32kDa line.

88 Lane 3: PAP-S1/RTA recombinant protein at the 60kDa line.

89 Lane 4: RTA/PAP-S1 recombinant protein at the 60kDa line

90 \*All other bands are due to proteins going through the His-Tag purification column from the  
91 initial expression reaction.

92

93 **Table 1.** Total protein content and purity. For each sample, protein content was determined using  
94 Qubit™ 3.0 Fluorometry; purity was determined by GelAnalyzer 2010 using values from Figure 1S  
95 (See Appendix 2 for details).

| Protein          | Total Produced | Reaction Volume | Purity | Final Product in 50uL |
|------------------|----------------|-----------------|--------|-----------------------|
| CalmL3 – control | 5338ng         | 50uL            | 68%    | 106.8ng/uL            |
| PAP-S1           | 4514ng         | 150uL           | 25.90% | 90.3ng/uL             |
| PAP-S1/RTA       | 5924ng         | 150uL           | 33.60% | 118.5ng/uL            |
| RTA/PAP-S1       | 3626ng         | 100uL           | 29.40% | 72.5ng/uL             |

96 2.2. Inhibitory activity of recombinant proteins on *E. coli* protein synthesis

97 Two different prokaryotic kits, the *E. coli* S30 T7 High-Yield Protein Expression System and the  
98 Expressway™ Mini Cell-Free Expression System, were used to control for variances in production  
99 systems. The same control protein was produced, namely CalmL3. Various concentrations of

100 recombinant proteins were added to each reaction and the amount of CalmL3 protein produced  
101 was compared to the amount of CalmL3 produced without the addition of any recombinant  
102 protein. These values were plotted as percent protein inhibition compared to control versus  
103 concentration (Figure 2). The IC<sub>50</sub> of PAP-S1/RTA was found to be around 460nM while the IC<sub>50</sub> of  
104 RTA/PAP-S1 was around 241nM (based on Figure 6S and Figure 7S, see appendix 3 for details); the  
105 IC<sub>50</sub> of PAP-S1 is known to be around 280nM [3]. Those initial results confirm RTA/PAP-S1 as  
106 more potent than PAP-S1/RTA. This was expected as the C terminal is known to play a major role  
107 in activity [23]. Those results also confirm that RTA/PAP-S1 is more potent than PAP-S1 alone.  
108 RTA/PAP-S1 will thus be the subject of the rest of the paper. The increased activity of RTA/PAP-S1  
109 compared to PAP-S1 alone can probably be explained by the fact that PAP-S1 and RTA do not dock  
110 onto the ribosome at the same site. Indeed, it was found that after PAP-S1 partially depurinates the  
111 *E. coli* ribosome, RTA is able to depurinate the same ribosome while RTA cannot depurinate an  
112 intact *E. coli* ribosome on its own [19-26].

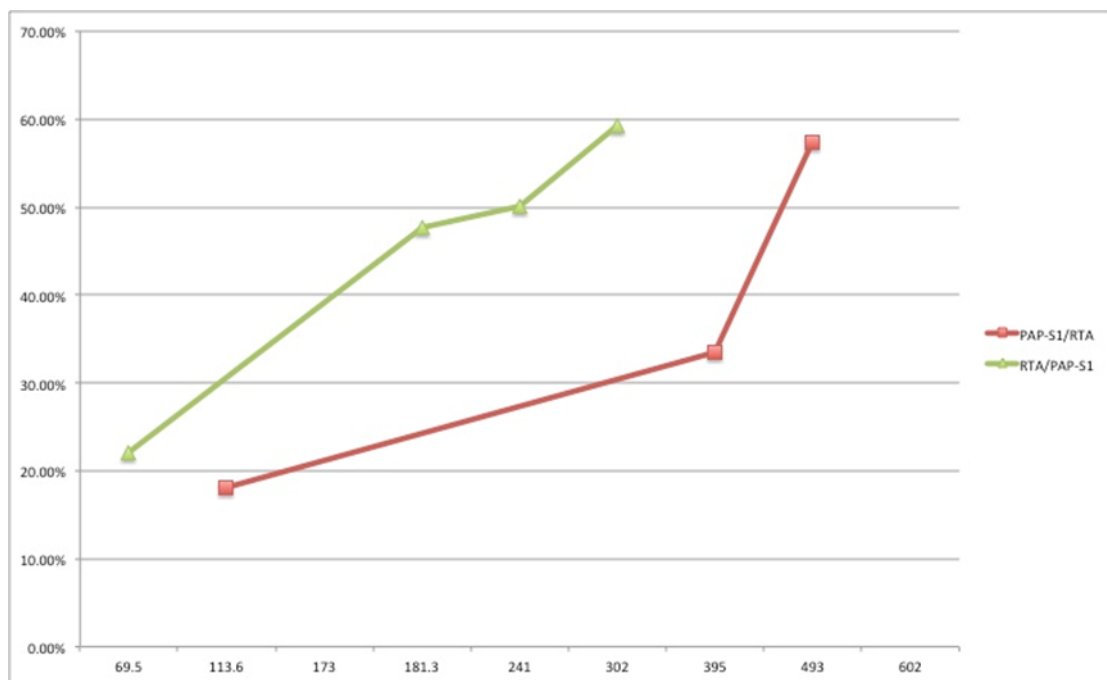

113

114 **Figure 2.** Percent protein inhibition compared to control. The Y-axis represents percent  
115 inhibition compared to control and the X-axis represents the concentration of each respective  
116 protein in nM.

### 117 2.3. Production and Purification of recombinant Proteins in *E. coli* culture

118 We were unable to produce the wild type proteins in either insect or yeast cell cultures. Thus,  
119 we decided to produce a mutated form of PAP-S1 (PAP-S1R68G) with a native signal peptide. We  
120 believed this would stabilize protein production but would greatly reduce activity in *E. coli* and  
121 somewhat reduce activity in eukaryotic cells in *E. coli* cell culture [21, 24]. Native environment of  
122 both PAP-S1R68G (purity of 60%) and RTA/PAP-S1R68G (purity of 55%) production are shown in  
123 Figure 3.a (purity determined by GelAnalyzer2010). More than 400ug of each protein was  
124 produced. However, as shown in Figure 3.b, 6-His tag purification process was very inefficient and  
125 a large amount of protein was lost in the wash (kept for further analysis). This loss may have been  
126 due to the 6-His tag being hidden by the protein in its final conformation. It is possible the double  
127 band is due to protein degradation or unwanted recombination at the production site by *E. coli*  
128 cells.

129 a)

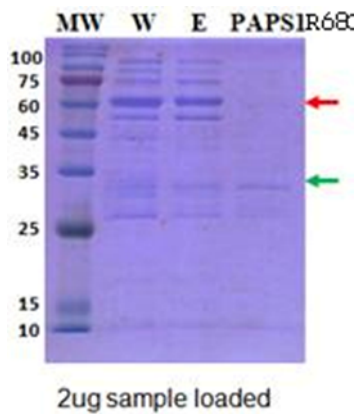

130

131 b)

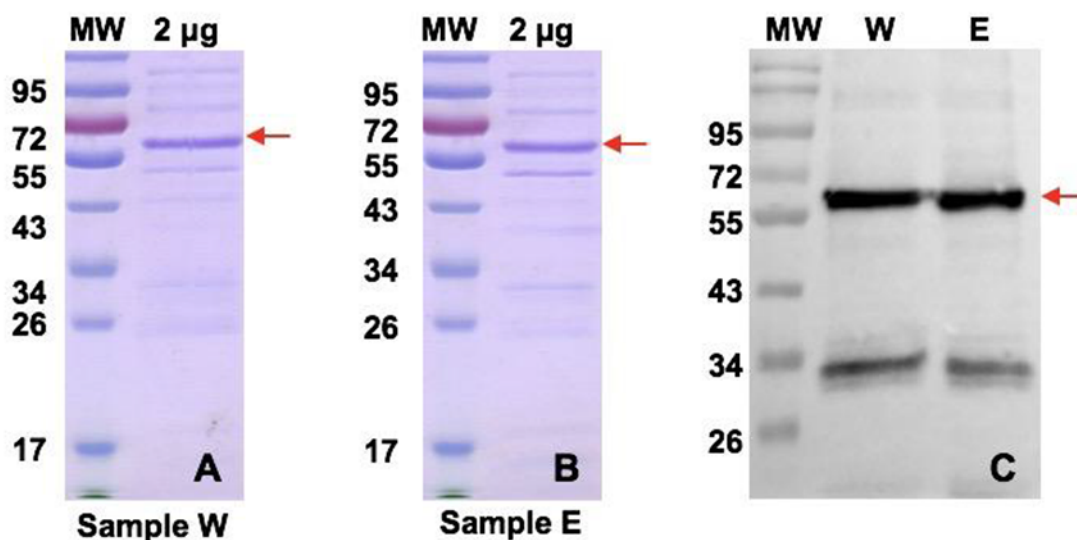

132

133 **Figure 3.** Protein Purification. a) Stained gel of RTA/PAP-S1R68G from third wash (sample W)  
 134 and from pooled eluted fraction (sample E) at 60kDa (red arrow) and of PAP-S1R68G at 30kDa  
 135 (green arrow), all from native environment, after buffer exchange. The purity of sample W was  
 136 65%, of sample E 55%, and of PAP-S1R68G 60%. b) Close up and Western Blot of sample W and E.  
 137 A double band is present and may be due to degradation of the protein or as a result of an  
 138 unwanted recombination by *E. coli* cells.

139 For each sample in Table 2, the final concentration was determined using a Bradford protein  
 140 assay; purity was determined using the GelAnalyzer 2010 (see appendix 4 for details). The yield  
 141 was very low, and again, a lot of protein was lost in the washes as the 6-His tag purification does  
 142 not appear to be the right system for those proteins.

143

144 **Table 2.** Protein concentration and purity. For each sample, protein content was determined using a  
 145 Bradford protein assay; purity was determined by GelAnalyzer 2010 as explained in appendix 4.

| Native protein | Final concentration | Volume | Final product | Purity |
|----------------|---------------------|--------|---------------|--------|
| PAP-S1R68G     | 0.23mg/ml           | 3.2ml  | 0.736mg       | 60%    |
| RTA/PAP-S1R68G | 0.53mg/ml           | 1.35ml | 0.716mg       | 55%    |

|                       |           |       |        |     |
|-----------------------|-----------|-------|--------|-----|
| <b>(sample E)</b>     |           |       |        |     |
| <b>RTA/PAP-S1R68G</b> | 0.26mg/ml | 4.8ml | 1.25mg | 65% |
| <b>(sample W)</b>     |           |       |        |     |

146 2.4. Inhibitory activity of recombinant proteins in the Rabbit Reticulate Lysate TnT® system

147 The inhibitory activity of PAP-S1R68G and RTA/PAP-S1R68G were determined using 5  
148 different concentrations of PAP-S1R68G and RTA/PAP-S1R68G (sample E) on the Rabbit Reticulate  
149 Lysate TnT® system using Luciferase as control. A Luciferase assay was used to determine  
150 Luciferase expression levels using a luminometer. The comparative plot is shown in Figure 4 and  
151 includes previous data on Ricin and RTA obtained similarly [22]. As can be observed,  
152 RTA/PAP-S1R68G behaves more like RTA than PAP-S1R68G and has an IC<sub>50</sub> at 0.025nM (similar to  
153 RTA 0.03nM) against 0.06nM for PAP-S1R68G. The total inhibition is attained at 0.83nM for  
154 RTA/PAP-S1R68G while PAP-S1R68G barely reaches 90% at 16.67nM, possibly due to the single  
155 point mutation (R68G). It is also interesting to note that PAP-S1R68G has about the same IC<sub>50</sub> as  
156 PAP-S2 (0.07) but a much higher total inhibition point (around 1.2nM for PAP-S2) [2]. These results  
157 not only show that RTA/PAP-S1R68G is at least twice as fast as PAP-S1R58G but also 16 times more  
158 potent. It is comparable to native RTA and can thus be assumed that non-mutated RTA/PAP-S1 will  
159 be even faster.

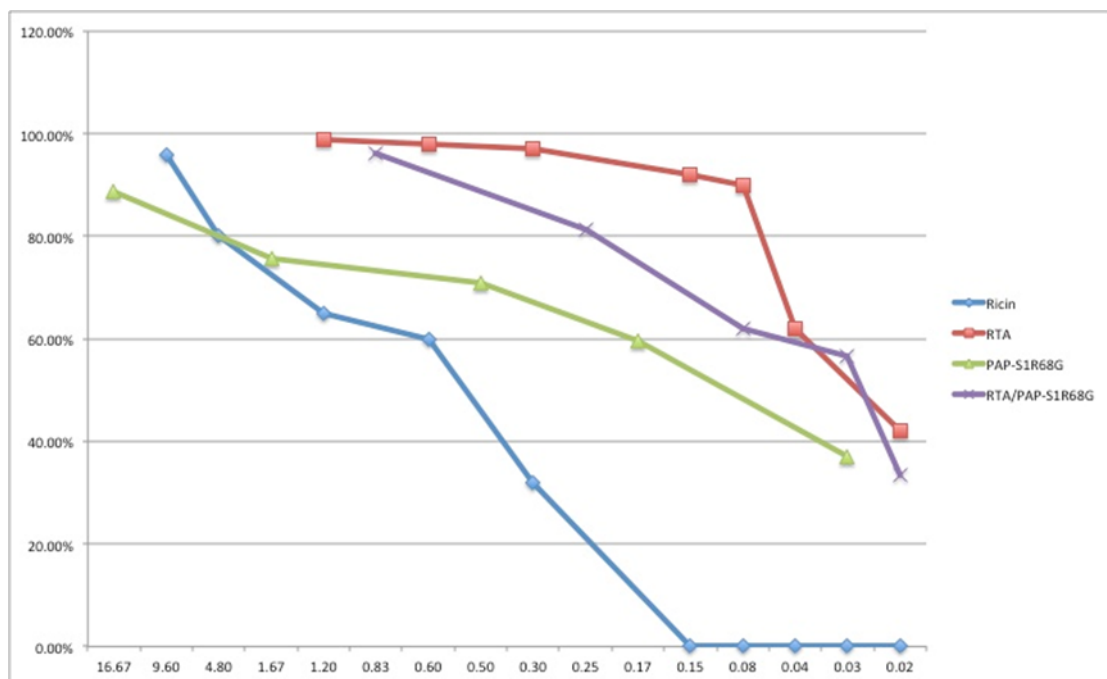

160

161 **Figure 4.** Comparative inhibitory activity. The Y-axis represents percent inhibition compared  
162 to control and the X-axis represents the concentration of each respective protein in nM. Results  
163 represent the average S.D. for two individual experiments.

164 The same inhibitory activity tests (Figure 5) were run under the same conditions for the  
165 proteins from sample W in order to determine whether binding or protein type isolation issues  
166 were causing the high amount of protein loss during washing. The results suggest behavior that is  
167 more like wild type Ricin protein, but with an IC<sub>50</sub> of 0.3nM against 0.5nM for wild type Ricin.

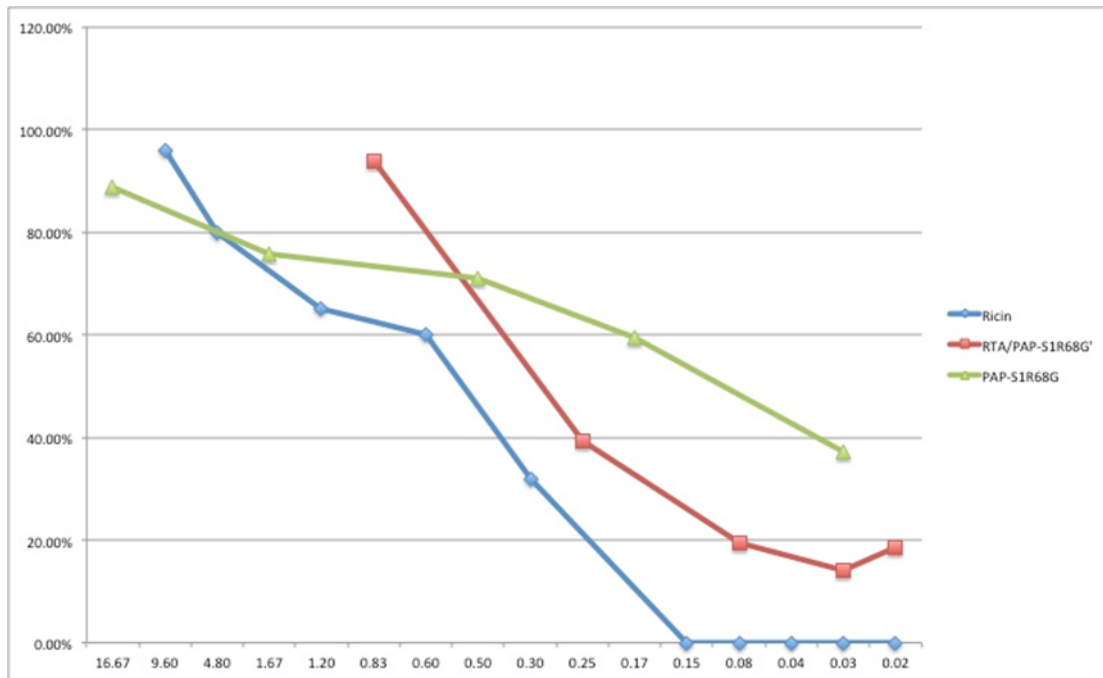

168

169 **Figure 5.** Comparative inhibitory activity. The Y-axis represents percent inhibition compared to  
170 control and the X-axis represents the concentration of each respective protein in nM. Results  
171 represent the average S.D. for two individual experiments.

172 The existence of two conformations of the same protein is possible as this fusion protein is new  
173 and it is difficult to predict exact conformation. Resequenced cDNA verified there were no acquired  
174 plasmid mutations. A prediction software [25] showed high probability (score of 0.9131) of  
175 existence of a di-sulfide bond between C173 and C539. This could explain the observed behavior  
176 and the difficulty in using 6-His tag for affinity purification. However, this remains to be proven, as  
177 this behavior was not observed in cell free expression system. Moreover, antibodies against PAP-S1  
178 may solve the yield issue and any interaction with the 6-His tag itself.

### 179 3. Discussion

180 The fusion protein between Ricin A chain C terminus and PAP-S1 N terminus was observed to  
181 be functional and active in both eukaryotic and prokaryotic cell free systems with a great increase in  
182 both speed and potency compared to PAP-S1 alone. It was also observed that it was comparable in  
183 activity to Ricin A chain in a eukaryotic system. It is the opinion of the authors that additional  
184 research should be done in order to determine both the cytotoxicity and selectivity of RTA/PAP-S1  
185 to PAP-S1 against a wide range of mammalian infectious diseases, including some types of cancers  
186 and a wide range of plant infectious diseases. We expect the RTA/PAP-S1 fusion protein to be a  
187 much more viable, potent, and less cytotoxic alternative to PAP-S1 alone for both agricultural and  
188 therapeutic applications.

### 189 4. Materials and Methods

190 The PureLink® Genomic Plant DNA Purification Kit, HisPur™ Ni-NTA Spin Purification Kit,  
191 0.2 m, Phire Plant Direct PCR Master Mix, PureLink™ Quick Gel Extraction and PCR Purification  
192 Combo Kit, Phire Hot Start II DNA Polymerase, Expressway™ Mini Cell-Free Expression System  
193 and NuPAGE™ 10% Bis-Tris Protein Gels, 1.5 mm, 15-well were purchased from Thermo Fisher  
194 Scientific. PCR Oligonucleotides and overlap extension products were synthesized by Integrated  
195 DNA Technologies. Rabbit Reticulate Lysate TnT® Quick Coupled Transcription/Translation  
196 System, Luciferase Assay System and the *E. coli* S30 T7 High-Yield Protein Expression System were

197 purchased from Promega. cDNA coding for the PAPS1[R68G] protein and  
198 Ricin-A-Chain/PAP-S1R68G was chemically synthesized with optimization for *E. coli* expression by  
199 GenScript. The *E. coli* pT7 expression vector and *E. coli* strains BL21(DE3) were purchased from  
200 Proteogenix. Total sample protein content was analyzed using Qubit™ 3.0 Fluorometer and  
201 Bradford protein assay. Luciferase assay readings were achieved using a Perkin Elmer EnVision  
202 Microplate Reader. Gel analyses were performed using a GelAnalyzer 2010.

#### 203 4.1. *E. coli* cell free expression and *E. coli* protein synthesis inhibition

##### 204 4.1.1. Design of the DNA sequences of the proteins for *E. coli* cell free expression system

205 The DNA sequenced was designed and isolated as described in our previous work [20]. In  
206 short, fresh seeds of both *Ricinus communis* and *Phytolacca Americana* were purchased a local  
207 supplier in Baltimore, MD and Ricin A Chain (RTA) and PAP-S1 (with native signal peptide)  
208 isolated and PCR amplified. The 6-His tag was added to PAP-S1 at the C terminal. The RTA/PAP-S1  
209 fusion protein was achieved through PCR extension, using the native RTA polylinker, between  
210 RTA C terminal and PAP-S1 (without the signal peptide) N terminal with the 6-His tag at RTA N  
211 terminal. The PAP-S1/RTA fusion protein was achieved through the same means but between  
212 PAP-S1 C terminal and RTA N terminal with the 6-His tag at PAP-S1 N terminal.

##### 213 4.1.2. *E. coli* cell free expression and purification

214 The PAP-S1, PAP-S1/RTA and RTA/PAP-S1 fusion proteins were produced using  
215 Expressway™ Mini Cell-Free Expression System as previously described [20]. In short, Linear DNA  
216 was used for all proteins in thrice the volume (150uL) for PAP-S1 and PAP-S1/RTA and twice the  
217 volume for RTA/PAP-S1 using the T7 promoter System. The proteins were purified using the  
218 HisPur™ Ni-NTA Spin Purification Kit, 0.2 m before being run on protein gels for confirmation.  
219 The total protein content was determined using Qubit™ 3.0 Fluorometer. Gels were analyzed using  
220 the GelAnalyzer2010.

##### 221 4.1.3. Inhibition of protein synthesis in cell free *E. coli* system

222 Enzyme activity of the purified recombinant proteins was determined by the intensity of the  
223 band on protein gel of a control against expression of the control without the recombinant proteins,  
224 after protein purification using the HisPur™ Ni-NTA Spin Purification Kit, 0.2 m, as previously  
225 described [20] using the *E. coli* S30 T7 High-Yield Protein Expression System. The control used was  
226 the pEXP5-NT/CALML3 control vector with a DNA template expressing an N-terminally-tagged  
227 human calmodulin-like 3 (CALML3) protein (under the T7 promoter). The concentration of  
228 CALML3 was determined for increasing concentrations of recombinant PAP-S1 and fusion proteins  
229 by measuring band intensity on a protein gel (Coomassie blue stained) by GelAnalyzer2010.

#### 230 4.2. *E. coli* in vivo expression system and Rabbit Reticulate Lysate protein synthesis inhibition

##### 231 4.2.1. Design of the DNA sequences of the proteins for *E. coli* in vivo expression system

232 The cDNA coding for a mutated version of PAP-S1 and RTA/PAP-S1, namely PAP-S1R68G  
233 and RTA/PAP-S1R68G, were chemically synthesized with optimization for *E. coli* expression by  
234 GenScript. The mutated form of PAP-S1 was used in order to reduce *E. coli* ribosome depuration  
235 by PAP-S1 and RTA/PAP-S1 while safeguarding their Eukaryotic ribosome depuration activities  
236 [21]. The native PAP-S1 signal peptide was kept for PAP-S1R68G with the addition of an *E. coli*  
237 signal peptide of two amino acids at PAP-S1R68G and RTA/PAP-S1R68G N terminal and with the  
238 6-His tag at PAP-S1R68G and RTA/PAP-S1R68G C terminal (see appendix 1 for details).

##### 239 4.2.2. *E. coli* in vivo expression vector



240 The cDNA sequences described above were cloned in an *E. coli* pT7 expression vector using  
241 the NcoI/XhoI cloning strategy (map of vectors in Appendix 1).

#### 242 4.2.3. *E. coli* protein production

243 Optimal conditions for *E. coli* B121(DE3) and modified B121(DE3) were determined for  
244 PAP-S1R68G and RTA/PAP-S1R68G respectively in small volumes before being scaled up to 1L  
245 production culture (please contact the authors for more details). In short, bacteria starter were  
246 obtained by incubation at 37°C and then followed by IPTG induction at specific temperatures and  
247 incubation times. The bacteria were then harvested by centrifugation, followed by lysis. The  
248 supernatant was collected after centrifugation for both proteins, the native proteins extracts.

#### 249 4.2.4. *E. coli* protein purification

250 The purification of the native proteins extracts was achieved by affinity versus His-tag on  
251 Ni-resin. The equilibration was done with a standard binding buffer. Wash and elution was  
252 performed by imidazole shift. After purification, fractions of interest were pooled, concentrated,  
253 and analyzed by SDS-PAGE. The final concentration was determined by Bradford protein assay.

#### 254 4.2.5. Rabbit Reticulate Lysate protein synthesis inhibition

255 The inhibitory activity of PAP-S1[R68G] and RTA-PAP-S1[R68G] were tested by using the  
256 Rabbit Reticulate Lysate TnT® Quick Coupled Transcription/Translation System and the Luciferase  
257 Assay System. Briefly, each transcription/translation reaction run was performed according to the  
258 instructions for use (IFU) in the presence of a T7 Luciferase reporter DNA, and the Luciferase  
259 expression level was determined with a Perkin Elmer EnVision Microplate Reader.  
260 Transcription/translation runs were done twice with and without addition of five different  
261 concentrations of PAP-S1R68G and RTA-PAP-S1R68G in order to determine the inhibitory effect of  
262 the proteins. PAP-S1R68G and RTA-PAP-S1R68G concentrations were adjusted by taking sample  
263 purity into consideration.

264

265 **Conflicts of Interest:** "The authors declare no conflict of interest."

266

## 267 References

- 268 1. Domashevskiy, AV & Goss, DJ. Pokeweed Antiviral Protein, a Ribosome Inactivating Protein: Activity,  
269 Inhibition and prospects. *Toxins* (Basel). 2015 Feb; 7(2): 274–298. doi: 10.3390/toxins7020274.
- 270 2. Poyet JL & Hoeveler A. cDNA cloning and expression of pokeweed antiviral protein from seeds in  
271 *Escherichia coli* and its inhibition of protein synthesis *in vitro*. *FEBS Lett.* 1997 Apr 7;406(1-2):97-100.
- 272 3. Honjo E, Dong D, Motoshima H, Watanabe K. Genomic clones encoding two isoforms of pokeweed  
273 antiviral protein in seeds (PAP-S1 and S2) and the Nglycosidase activities of their recombinant proteins  
274 on ribosomes and DNA in comparison with other isoforms. *J Biochem.* 2002 Feb;131(2):225-31.
- 275 4. Wang P, Zoubenko O, Tumer NE. Reduced toxicity and broad spectrum resistance to viral and fungal  
276 infection in transgenic plants expressing pokeweed antiviral protein II. *Plant Mol Biol.* 1998  
277 Dec;38(6):957-64.
- 278 5. Lodge JK, Kaniewski WK, Tumer NE. Broad-spectrum virus resistance in transgenic plants expressing  
279 pokeweed antiviral protein. *Proc Natl Acad Sci U S A.* 1993 Aug 1;90(15):7089-93.
- 280 6. Ishag HZ, Li C, Huang L, Sun MX, Ni B, Guo CX, Mao X. Inhibition of Japanese encephalitis virus  
281 infection *in vitro* and *in vivo* by pokeweed antiviral protein. *Virus Res.* 2013 Jan;171(1):89-96. doi:  
282 10.1016/j.virusres.2012.10.032.
- 283 7. Rajamohan F, Venkatachalam TK, Irvin JD, Uckun FM. Pokeweed antiviral protein isoforms PAP-I,  
284 PAP-II, and PAP-III depurinate RNA of human immunodeficiency virus (HIV)-1. *Biochem Biophys Res*  
285 *Commun.* 1999 Jul 5;260(2):453-8.DOI: 10.1006/bbrc.1999.0922.
- 286 8. Mansouri S, Choudhary G, Sarzala PM, Ratner L, Hudak KA. Suppression of human T-cell leukemia  
287 virus I gene expression by pokeweed antiviral protein. *J Biol Chem.* 2009 Nov 6;284(45):31453-62. doi:  
288 10.1074/jbc.M109.046235.
- 289 9. Aron GM, Irvin JD. Inhibition of herpes simplex virus multiplication by the pokeweed antiviral protein.  
290 *Antimicrob Agents Chemother.* 1980 Jun; 17: 1032-1033.
- 291 10. Tomlinson JA, Walker VM, Flewett TH, Barclay GR. The inhibition of infection by cucumber mosaic virus  
292 and influenza virus by extracts from *Phytolacca americana*. *J. Gen. Virol.* 1974, 22, 225–232. DOI:  
293 10.1099/0022-1317-22-2-225.
- 294 11. He YW, Guo CX, Pan YF, Peng C, Weng ZH. Inhibition of hepatitis B virus replication by pokeweed  
295 antiviral protein *in vitro*. *World J Gastroenterol.* 2008 Mar 14;14(10):1592-7. doi: 10.3748/wjg.14.1592.
- 296 12. Ussery MA, Irvin JD, Hardesty B. Inhibition of poliovirus replication by a plant antiviral peptide. *Ann N*  
297 *Y Acad Sci.* 1977 Mar 4;284:431-40. DOI: 10.1111/j.1749-6632.1977.tb21979.x
- 298 13. Lord MJ, Jolliffe NA, Marsden CJ, Pateman CS, Smith DC, Spooner RA, Watson PD, Roberts LM. Ricin.  
299 Mechanisms of cytotoxicity. *Toxicol Rev.* 2003;22(1):53-64.
- 300 14. Gilabert-Oriol R, Weng A, Mallinckrodt B, Melzig MF, Fuchs H, Thakur M. Immunotoxins constructed  
301 with ribosome-inactivating proteins and their enhancers: a lethal cocktail with tumor specific efficacy.  
302 *Curr Pharm Des.* 2014;20(42):6584-643. Review.
- 303 15. Benigni F, Canevari S, Gadina M, Adobati E, Ferreri AJ, Di Celle EF, Comolli R, Colnaghi MI. Preclinical  
304 evaluation of the ribosome-inactivating proteins PAP-1, PAP-S and RTA in mice. *Int J Immunopharmacol.*  
305 1995 Oct;17(10):829-39.
- 306 16. Schindler J, Gajavelli S, Ravandi F, et al. A Phase I Study of a Combination of anti-CD19 and anti-CD22  
307 Immunotoxins (Combotox) in Adult Patients with Refractory B-Lineage Acute Lymphoblastic  
308 Leukaemia. *British Journal of Haematology.* 2011;154(4):10.1111/j.1365-2141.2011.08762.x
- 309 17. Meany HJ, Seibel NL, Krailo M, et al. Feasibility Study of a Novel Experimental Induction Protocol  
310 Combining B43-PAP (anti-CD19) Immunotoxin with Standard Induction Chemotherapy in Children and  
311 Adolescents with Relapsed B-lineage ALL. A report from the Children's Oncology Group. *Journal of*  
312 *immunotherapy* (Hagerstown, Md : 1997). 2015;38(7):299-305.
- 313 18. Rothan HA, Bahrani H, Shankar EM, Rahman NA, Yusuf R. Inhibitory effects of a peptide-fusion protein  
314 (Latarcin-PAP1-Thanatin) against chikungunya virus. *Antiviral Res.* 2014 Aug;108:173-80. doi:  
315 10.1016/j.antiviral.2014.05.019.
- 316 19. Chaddock, JA, Monzingo, AF, Robertus, JD, Lord, JM, & Roberts, LM. Major Structural Differences  
317 between Pokeweed Antiviral Protein and Ricin A-Chain do not Account for their Differing Ribosome  
318 Specificity. *Eur J Biochem.* 1996 Jan 15;235(1-2):159-66.

- 319 20. Yasser S. Hassan, Sherry L. Ogg. Gene cloning and construction of prokaryotic and plant expression  
320 vectors of RICIN-A-Chain/PAP-S1 fusion protein and its inhibition of protein synthesis. *bioRxiv*. 2016  
321 Mar;046060; doi: 10.1101/046060
- 322 21. Chaddock JA, Lord JM, Hartley MR, Roberts LM. Pokeweed antiviral protein (PAP) mutations which  
323 permit E.coli growth do not eliminate catalytic activity towards prokaryotic ribosomes. *Nucleic Acids*  
324 *Research*. 1994;22(9):1536-1540.
- 325 22. Hale ML. Microtiter-based assay for evaluating the biological activity of ribosome-inactivating proteins.  
326 *Pharmacol Toxicol*. 2001; 88: 255-60.
- 327 23. Marshall RS, D'Avila F, Di Cola A, Traini R, Spanò L, Fabbrini MS, Ceriotti A. Signal peptide-regulated  
328 toxicity of a plant ribosome-inactivating protein during cell stress. *Plant J*. 2011 Jan;65(2):218-29. doi:  
329 10.1111/j.1365-313X.2010.04413.x.
- 330 24. Xu J, Meng AX, Hefferon KL, Ivanov IG, Abouhaidar MG. Effect of N-terminal deletions on the activity of  
331 pokeweed antiviral protein expressed in *E. coli*. *Biochimie*. 1998 Dec;80(12):1069-76.
- 332 25. Ferre F & Clote P. DiANNA: a web server for disulfide connectivity prediction. *Nucleic Acids Res*. 2005  
333 Jul 1;33(Web Server issue):W230-2. Available online: <http://clavius.bc.edu/~clotelab/DiANNA/> (Accessed  
334 20 April 2017)
- 335 26. Chiou J-C, Li X-P, Remacha M, Ballesta JPG, Tumer NE. The ribosomal stalk is required for ribosome  
336 binding, depurination of the rRNA and cytotoxicity of ricin A chain in *Saccharomyces cerevisiae*. *Molecular*  
337 *microbiology*. 2008;70(6):1441-1452.
- 338
